# Supplementary material for: Dielectric properties depend on the crystal structure of perovskite-type RbTaO3 synthesized at high pressure
Source: Royal Society of Chemistry journal article supplement (doi:10.1039/d4dt03207a), 2025-01-01
Supplement: d4dt03207a1.pdf [file d4dt03207a1.pdf]

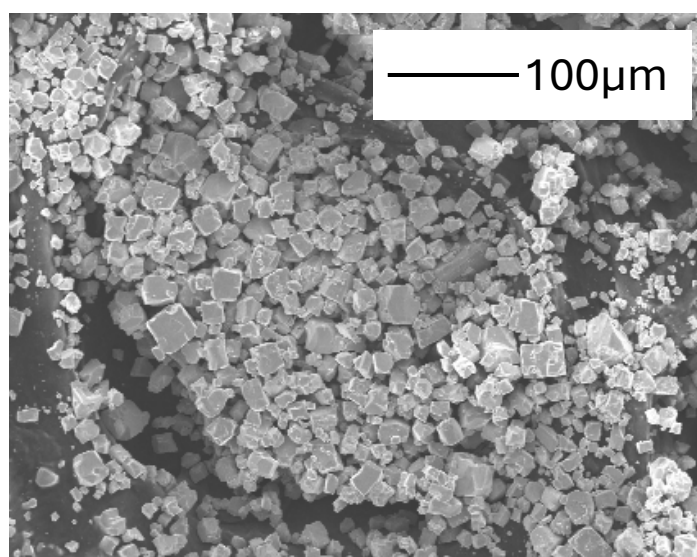

Fig. S1 SEM image of high-pressure phase (HPP) of RbTaO<sub>3</sub>.

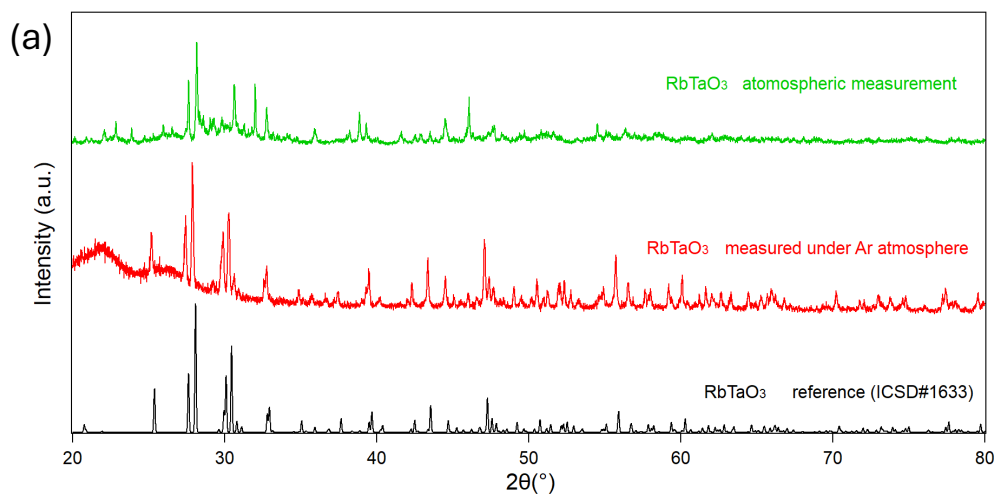

Fig. S2(a) Powder x-ray diffraction (XRD) patterns of ambient pressure phase (APP) of RbTaO<sub>3</sub>, and reference. The sample under atmospheric condition absorbed H<sub>2</sub>O from the air, thus the peak position differs from the sample measured under Ar atmosphere.

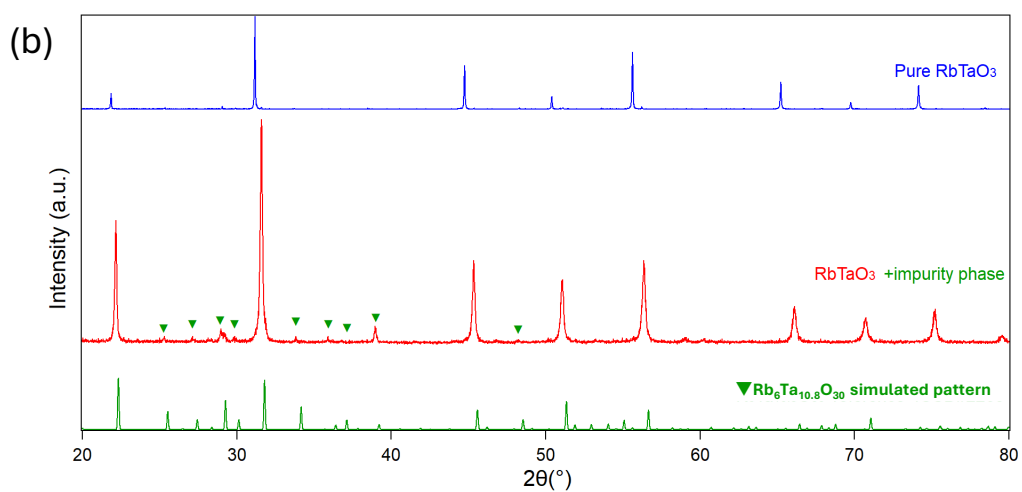

Fig. S2(b) XRD patterns of HPP of single phase of RbTaO<sub>3</sub> without and with impurity, and reference. HPP has an impurity phase, and it is thought of as the compounds that have a tetragonal tungsten bronze structure, using the APP which absorbs H<sub>2</sub>O from the air.

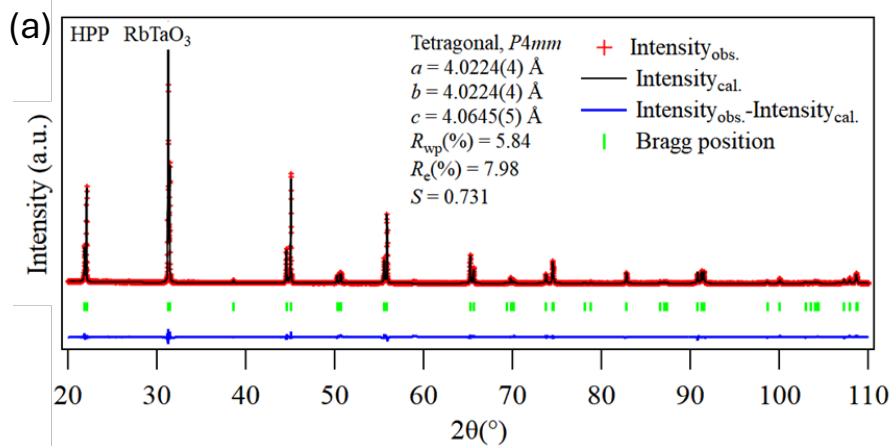

| Atom | Site | Occ. | $x$ | $y$ | $z$        | $U_{iso} (\text{\AA}^2)$ |
|------|------|------|-----|-----|------------|--------------------------|
| Rb   | 1a   | 1    | 0   | 0   | 0          | 0.00253                  |
| Ta   | 1b   | 1    | 1/2 | 1/2 | 0.5267(10) | 0.00182                  |
| O1   | 1b   | 1    | 1/2 | 1/2 | 0.016      | 0.00329                  |
| O2   | 2c   | 1    | 0   | 1/2 | 0.518      | 0.00305                  |

Fig. S3(a) Rietveld analysis ( $\lambda=1.540560 \text{ \AA}$ ) of HPP of RbTaO<sub>3</sub> at 200 K (top: XRD patterns, bottom: refined parameters)

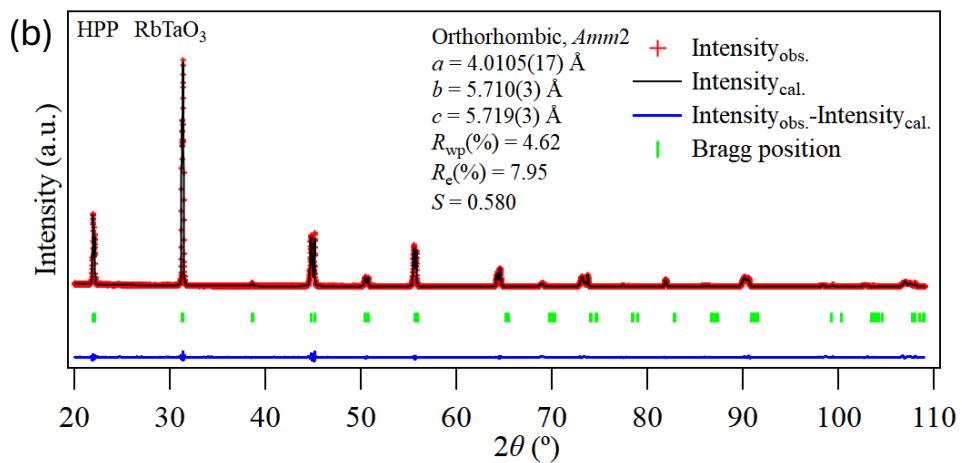

| Atom | Site | Occ. | $x$ | $y$    | $z$        | $U_{iso} (\text{\AA}^2)$ |
|------|------|------|-----|--------|------------|--------------------------|
| Rb   | $2a$ | 1    | 0   | 0      | 0          | 0.00253                  |
| Ta   | $2b$ | 1    | 1/2 | 0      | 0.5183(12) | 0.00182                  |
| O1   | $2a$ | 1    | 0   | 0      | 0.348(10)  | 0.00329                  |
| O2   | $4e$ | 1    | 1/2 | 0.2659 | 0.261(9)   | 0.00303                  |

Fig. S3(b) Rietveld analysis ( $\lambda=1.540560 \text{ \AA}$ ) of HPP of RbTaO<sub>3</sub> at 10 K (top: XRD patterns, bottom: refined parameters)

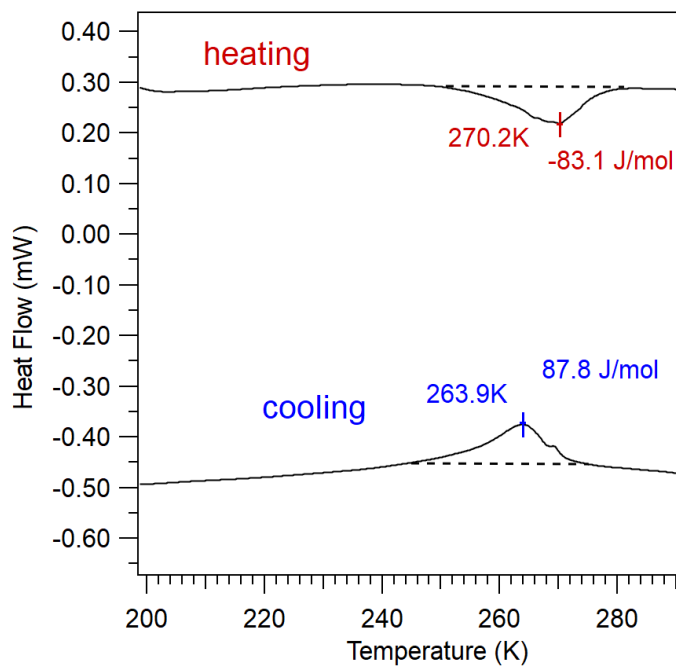

Fig. S4 Thermal analysis of Differential Scanning Calorimetry (DSC). Transition temperature was 263.9 K in cooling and 270.2 K in heating. the enthalpy changes with the phase transitions are  $163 \text{ J mol}^{-1}$  in cooling and  $-76.4 \text{ J mol}^{-1}$  in heating.
